# Supplementary material for: Are Psychological Distress and Resilience Associated with Dietary Intake Among Australian University Students?
Source: PubMed Central journal article supplement (PMC6862530; doi:10.3390/ijerph16214099), 2019-10-24
Supplement: ijerph-16-04099-s001.pdf [file ijerph-16-04099-s001.pdf]

**Supplementary Table S1** Linear regression results of psychological distress and resilience scores with dietary intake in a sample of Australian university students ( $n = 2710$ ), including full results of confounder variables

|                                          | Psychological distress score      |        |        | Resilience score                  |        |        |
|------------------------------------------|-----------------------------------|--------|--------|-----------------------------------|--------|--------|
|                                          | $\beta$ -Coefficient <sup>a</sup> | SE     | $p$    | $\beta$ -Coefficient <sup>a</sup> | SE     | $p$    |
| <b>Vegetable (serves/day)</b>            | -0.368                            | 0.096  | <0.001 | 0.055                             | 0.010  | <0.001 |
| <b>Gender</b>                            |                                   |        | <0.001 |                                   |        | <0.001 |
| Reference category = female              |                                   |        |        |                                   |        |        |
| Male                                     | -2.427                            | 0.328  | <0.001 | 0.329                             | 0.035  | <0.001 |
| Another gender identity                  | 2.531                             | 1.920  | 0.188  | -0.002                            | 0.205  | 0.992  |
| <b>Age</b>                               | -0.125                            | 0.020  | <0.001 | 0.008                             | 0.002  | 0.001  |
| <b>Non-ATSI</b>                          | -2.390                            | 0.843  | 0.005  |                                   |        |        |
| <b>Marital status</b>                    |                                   |        |        |                                   |        | 0.022  |
| Reference category = Never married       |                                   |        |        |                                   |        |        |
| Married                                  |                                   |        |        | 0.024                             | 0.053  | 0.643  |
| Defacto                                  |                                   |        |        | -0.112                            | 0.052  | 0.031  |
| Separated                                |                                   |        |        | 0.069                             | 0.134  | 0.608  |
| Divorced                                 |                                   |        |        | 0.090                             | 0.105  | 0.389  |
| Widowed                                  |                                   |        |        | 0.840                             | 0.344  | 0.015  |
| <b>Living situation</b>                  |                                   |        | <0.001 |                                   |        | <0.001 |
| Reference category = Parents home        |                                   |        |        |                                   |        |        |
| Own home                                 | -1.655                            | 0.537  | 0.002  | 0.265                             | 0.062  | <0.001 |
| On-campus                                | -1.237                            | 0.551  | 0.025  | 0.083                             | 0.058  | 0.153  |
| Renting                                  | -0.167                            | 0.347  | 0.630  | 0.082                             | 0.038  | 0.031  |
| Boarding/Homestay                        | 1.519                             | 1.013  | 0.134  | -0.034                            | 0.108  | 0.754  |
| Irregular                                | 3.027                             | 1.457  | 0.038  | -0.211                            | 0.156  | 0.175  |
| <b>Not receiving financial support</b>   | -0.800                            | 0.297  | 0.007  | 0.089                             | 0.032  | 0.005  |
| <b>Type of degree</b>                    |                                   |        | 0.002  |                                   |        |        |
| Reference category = Undergraduate       |                                   |        |        |                                   |        |        |
| Postgraduate                             | -1.318                            | 0.378  | <0.001 |                                   |        |        |
| Other <sup>b</sup>                       | -0.730                            | 0.901  | 0.418  |                                   |        |        |
| <b>Faculty of study</b>                  |                                   |        | <0.001 |                                   |        | <0.001 |
| Reference category = Health and Medicine |                                   |        |        |                                   |        |        |
| Business and Law                         | 0.488                             | 0.456  | 0.285  | -0.062                            | 0.048  | 0.201  |
| Education and Arts                       | 1.850                             | 0.375  | <0.001 | -0.198                            | 0.040  | <0.001 |
| Engineering                              | 1.266                             | 0.498  | 0.011  | -0.155                            | 0.053  | 0.003  |
| Science                                  | 1.273                             | 0.452  | 0.005  | -0.134                            | 0.048  | 0.006  |
| English Language and Foundation          |                                   |        |        |                                   |        |        |
| Studies                                  | 2.343                             | 1.057  | 0.027  | -0.203                            | 0.069  | 0.003  |
| <b>Physical activity (mins/week)</b>     | -0.001                            | 0.0004 | 0.006  | 0.0002                            | 0.0001 | <0.001 |
| <b>Non-smoker</b>                        | -1.201                            | 0.588  | 0.041  |                                   |        |        |
| <b>Sleep (hours/24hr period)</b>         | -0.636                            | 0.106  | <0.001 |                                   |        |        |
| <b>Average sitting time (mins/day)</b>   | 0.002                             | 0.001  | 0.001  |                                   |        |        |
| <b>AUDIT score</b>                       | 0.160                             | 0.029  | <0.001 |                                   |        |        |
| <b>DUDIT score</b>                       | 0.289                             | 0.047  | <0.001 | -0.028                            | 0.005  | <0.001 |
| <b>BMI (kg/m<sup>2</sup>)</b>            | 0.158                             | 0.024  | <0.001 |                                   |        |        |
| <b>Fruit (serves/day)</b>                | -0.374                            | 0.113  | 0.001  | 0.028                             | 0.012  | 0.022  |
| <b>Gender</b>                            |                                   |        | <0.001 |                                   |        | <0.001 |
| Reference category = female              |                                   |        |        |                                   |        |        |
| Male                                     | -2.310                            | 0.325  | <0.001 | 0.302                             | 0.035  | <0.001 |
| Another gender identity                  | 2.546                             | 1.922  | 0.185  | 0.006                             | 0.206  | 0.976  |
| <b>Age</b>                               | -0.127                            | 0.020  | <0.001 | 0.010                             | 0.002  | <0.001 |
| <b>Non-ATSI</b>                          | -2.465                            | 0.844  | 0.004  |                                   |        |        |
| <b>Living situation</b>                  |                                   |        | <0.001 |                                   |        | <0.001 |
| Reference category = Parents home        |                                   |        |        |                                   |        |        |
| Own home                                 | -1.738                            | 0.537  | 0.001  | 0.264                             | 0.057  | <0.001 |
| On-campus                                | -1.114                            | 0.552  | 0.044  | 0.075                             | 0.058  | 0.200  |
| Renting                                  | -0.175                            | 0.347  | 0.614  | 0.067                             | 0.037  | 0.067  |
| Boarding/Homestay                        | 1.614                             | 1.014  | 0.112  | -0.060                            | 0.109  | 0.579  |
| Irregular                                | 2.844                             | 1.458  | 0.051  | -0.199                            | 0.156  | 0.203  |

|                                              |        |        |                              |        |        |                  |
|----------------------------------------------|--------|--------|------------------------------|--------|--------|------------------|
| <b>Not receiving financial support</b>       | -0.783 | 0.298  | <b>0.009</b>                 | 0.087  | 0.032  | <b>0.006</b>     |
| <b>Type of degree</b>                        |        |        | <b>0.003</b>                 |        |        |                  |
| Reference category = Undergraduate           |        |        |                              |        |        |                  |
| Postgraduate                                 | -1.290 | 0.378  | 0.001                        |        |        |                  |
| Other <sup>b</sup>                           | -0.551 | 0.902  | 0.541                        |        |        |                  |
| <b>Faculty of study</b>                      |        |        | <b>&lt;0.001</b>             |        |        | <b>&lt;0.001</b> |
| Reference category = Health and Medicine     |        |        |                              |        |        |                  |
| Business and Law                             | 0.584  | 0.456  | 0.200                        | -0.074 | 0.049  | 0.125            |
| Education and Arts                           | 1.959  | 0.375  | <0.001                       | -0.216 | 0.040  | <0.001           |
| Engineering                                  | 1.316  | 0.498  | 0.008                        | -0.158 | 0.053  | 0.003            |
| Science                                      | 1.266  | 0.453  | 0.005                        | -0.141 | 0.048  | 0.004            |
| English Language and Foundation Studies      | 2.414  | 1.058  | 0.023                        | -0.235 | 0.069  | 0.001            |
| <b>Physical activity (mins/week)</b>         | -0.001 | 0.001  | <b>0.004</b>                 | 0.0003 | 0.0001 | <b>&lt;0.001</b> |
| <b>Non-smoker</b>                            | -1.240 | 0.588  | <b>0.035</b>                 |        |        |                  |
| <b>Sleep (hours/24hr period)</b>             | -0.637 | 0.106  | <b>&lt;0.001</b>             |        |        |                  |
| <b>Average sitting time (mins/day)</b>       | 0.002  | 0.0004 | <b>&lt;0.001</b>             |        |        |                  |
| <b>AUDIT score</b>                           | 0.159  | 0.030  | <b>&lt;0.001</b>             |        |        |                  |
| <b>DUDIT score</b>                           | 0.285  | 0.047  | <b>&lt;0.001</b>             | -0.028 | 0.005  | <b>&lt;0.001</b> |
| <b>BMI (kg/m<sup>2</sup>)</b>                | 0.157  | 0.025  | <b>&lt;0.001</b>             | -0.012 | 0.003  | <b>&lt;0.001</b> |
| <b>Soft drink</b>                            |        |        | <b>&lt;0.001<sup>c</sup></b> |        |        | <b>&lt;0.001</b> |
| Reference category = 1 cup or less per week  |        |        |                              |        |        |                  |
| 2-6 cups per week                            | 1.409  | 0.360  | <0.001                       | -0.095 | 0.039  | 0.014            |
| 1 cup per day                                | 2.471  | 0.742  | 0.001                        | -0.223 | 0.080  | 0.005            |
| 2 or more cups per day                       | 2.387  | 0.785  | 0.002                        | -0.235 | 0.084  | 0.005            |
| <b>Gender</b>                                |        |        | <b>&lt;0.001</b>             |        |        | <b>&lt;0.001</b> |
| Reference category = female                  |        |        |                              |        |        |                  |
| Male                                         | -2.515 | 0.328  | <0.001                       | 0.326  | 0.035  | <0.001           |
| Another gender identity                      | 2.256  | 1.918  | 0.240                        | 0.021  | 0.206  | 0.921            |
| <b>Age</b>                                   | -0.118 | 0.020  | <b>&lt;0.001</b>             | 0.008  | 0.002  | <b>&lt;0.001</b> |
| <b>Non-ATSI</b>                              | -2.318 | 0.842  | <b>0.006</b>                 |        |        |                  |
| <b>Living situation</b>                      |        |        | <b>&lt;0.001</b>             |        |        | <b>&lt;0.001</b> |
| Reference category = Parents home            |        |        |                              |        |        |                  |
| Own home                                     | -1.670 | 0.536  | 0.002                        | 0.260  | 0.057  | <0.001           |
| On-campus                                    | -1.117 | 0.551  | 0.043                        | 0.092  | 0.059  | 0.118            |
| Renting                                      | -0.066 | 0.347  | 0.849                        | 0.062  | 0.037  | 0.092            |
| Boarding/Homestay                            | 1.573  | 1.012  | 0.120                        | -0.055 | 0.108  | 0.610            |
| Irregular                                    | 2.972  | 1.455  | 0.041                        | -0.201 | 0.156  | 0.198            |
| <b>Not receiving financial support</b>       | -0.820 | 0.297  | <b>0.006</b>                 | 0.095  | 0.032  | <b>0.003</b>     |
| <b>Type of degree</b>                        |        |        | <b>0.007</b>                 |        |        |                  |
| Reference category = Undergraduate           |        |        |                              |        |        |                  |
| Postgraduate                                 | -1.194 | 0.378  | 0.002                        |        |        |                  |
| Other <sup>b</sup>                           | -0.439 | 0.899  | 0.625                        |        |        |                  |
| <b>Faculty of study</b>                      |        |        | <b>&lt;0.001</b>             |        |        | <b>&lt;0.001</b> |
| Reference category = Health and Medicine     |        |        |                              |        |        |                  |
| Business and Law                             | 0.522  | 0.455  | 0.251                        | -0.066 | 0.049  | 0.173            |
| Education and Arts                           | 1.879  | 0.374  | <0.001                       | -0.208 | 0.040  | <b>&lt;0.001</b> |
| Engineering                                  | 1.312  | 0.497  | 0.008                        | -0.160 | 0.053  | 0.002            |
| Science                                      | 1.283  | 0.452  | 0.005                        | -0.142 | 0.048  | 0.003            |
| English Language and Foundation Studies      | 1.948  | 1.059  | 0.066                        | -0.197 | 0.069  | 0.005            |
| <b>Physical activity (mins/week)</b>         | -0.002 | 0.001  | <b>0.001</b>                 | 0.0003 | 0.0001 | <b>&lt;0.001</b> |
| <b>Sleep (hours/24hr period)</b>             | -0.610 | 0.106  | <b>&lt;0.001</b>             |        |        |                  |
| <b>Average sitting time (mins/day)</b>       | 0.002  | 0.001  | <b>&lt;0.001</b>             |        |        |                  |
| <b>AUDIT score</b>                           | 0.172  | 0.029  | <b>&lt;0.001</b>             | -0.007 | 0.003  | <b>0.032</b>     |
| <b>DUDIT score</b>                           | 0.302  | 0.045  | <b>&lt;0.001</b>             | -0.023 | 0.005  | <b>&lt;0.001</b> |
| <b>BMI (kg/m<sup>2</sup>)</b>                | 0.153  | 0.025  | <b>&lt;0.001</b>             | -0.011 | 0.003  | <b>&lt;0.001</b> |
| <b>Takeaway food</b>                         |        |        | <b>&lt;0.001</b>             |        |        | <b>0.001</b>     |
| Reference category = Less than once per week |        |        |                              |        |        |                  |
| 1-2 times per week                           | 1.441  | 0.332  | <0.001                       | -0.124 | 0.035  | <0.001           |
| 3-4 times per week                           | 1.279  | 0.661  | 0.053                        | -0.129 | 0.071  | 0.069            |

|                                              |        |       |                  |        |        |                  |
|----------------------------------------------|--------|-------|------------------|--------|--------|------------------|
| 5-6 times per week                           | 3.613  | 1.514 | 0.017            | -0.380 | 0.162  | 0.019            |
| Everyday                                     | 9.494  | 4.162 | 0.023            | 0.031  | 0.446  | 0.944            |
| <b>Gender</b>                                |        |       | <b>&lt;0.001</b> |        |        | <b>&lt;0.001</b> |
| Reference category = female                  |        |       |                  |        |        |                  |
| Male                                         | -2.423 | 0.326 | <b>&lt;0.001</b> | 0.315  | 0.035  | <0.001           |
| Another gender identity                      | 2.497  | 1.919 | 0.193            | 0.016  | 0.206  | 0.939            |
| <b>Age</b>                                   | -0.119 | 0.020 | <b>&lt;0.001</b> | 0.009  | 0.002  | <0.001           |
| <b>Non-ATSI</b>                              | -2.182 | 0.844 | 0.010            |        |        |                  |
| <b>Living situation</b>                      |        |       | <b>&lt;0.001</b> |        |        | <0.001           |
| Reference category = Parents home            |        |       |                  |        |        |                  |
| Own home                                     | -1.679 | 0.536 | 0.002            | 0.259  | 0.057  | <0.001           |
| On-campus                                    | -1.234 | 0.551 | 0.025            | 0.084  | 0.058  | 0.148            |
| Renting                                      | -0.171 | 0.347 | 0.622            | 0.065  | 0.037  | 0.078            |
| Boarding/Homestay                            | 1.416  | 1.011 | 0.161            | -0.043 | 0.109  | 0.693            |
| Irregular                                    | 2.890  | 1.454 | 0.047            | -0.201 | 0.156  | 0.197            |
| <b>Not receiving financial support</b>       | -0.835 | 0.297 | 0.005            | 0.090  | 0.032  | 0.005            |
| <b>Type of degree</b>                        |        |       | <b>0.004</b>     |        |        |                  |
| Reference category = Undergraduate           |        |       |                  |        |        |                  |
| Postgraduate                                 | -1.262 | 0.377 | 0.001            |        |        |                  |
| Other <sup>b</sup>                           | -0.510 | 0.901 | 0.571            |        |        |                  |
| <b>Faculty of study</b>                      |        |       | <b>&lt;0.001</b> |        |        | <b>&lt;0.001</b> |
| Reference category = Health and Medicine     |        |       |                  |        |        |                  |
| Business and Law                             | 0.474  | 0.455 | 0.298            | -0.065 | 0.049  | 0.184            |
| Education and Arts                           | 1.924  | 0.374 | <0.001           | -0.213 | 0.040  | <0.001           |
| Engineering                                  | 1.387  | 0.498 | 0.005            | -0.168 | 0.053  | 0.002            |
| Science                                      | 1.313  | 0.452 | 0.004            | -0.145 | 0.048  | 0.003            |
| English Language and Foundation              |        |       |                  |        |        |                  |
| Studies                                      | 1.999  | 1.062 | 0.060            | -0.213 | 0.069  | 0.002            |
| <b>Physical activity (mins/week)</b>         | -0.001 | 0.001 | <b>0.003</b>     | 0.0003 | 0.0001 | <b>&lt;0.001</b> |
| <b>Non-smoker</b>                            | -1.242 | 0.586 | <b>0.034</b>     |        |        |                  |
| <b>Sleep (hours/24hr period)</b>             | -0.629 | 0.106 | <b>&lt;0.001</b> |        |        |                  |
| <b>Average sitting time (mins/day)</b>       | 0.002  | 0.001 | <b>&lt;0.001</b> |        |        |                  |
| <b>AUDIT score</b>                           | 0.152  | 0.029 | <b>&lt;0.001</b> |        |        |                  |
| <b>DUDIT score</b>                           | 0.271  | 0.047 | <b>&lt;0.001</b> | -0.026 | 0.005  | <b>&lt;0.001</b> |
| <b>BMI (kg/m<sup>2</sup>)</b>                | 0.148  | 0.025 | <b>&lt;0.001</b> | -0.011 | 0.003  | <b>&lt;0.001</b> |
| <b>Breakfast</b>                             |        |       | <b>&lt;0.001</b> |        |        | <b>0.005</b>     |
| Reference category = Less than once per week |        |       |                  |        |        |                  |
| 1-2 times per week                           | -1.228 | 0.637 | 0.054            | 0.137  | 0.069  | 0.046            |
| 3-4 times per week                           | -2.078 | 0.599 | 0.001            | 0.076  | 0.064  | 0.237            |
| 5-6 times per week                           | -1.780 | 0.588 | 0.002            | 0.002  | 0.063  | 0.978            |
| Everyday                                     | -3.004 | 0.481 | <0.001           | 0.142  | 0.051  | 0.006            |
| <b>Gender</b>                                |        |       | <b>&lt;0.001</b> |        |        | <b>&lt;0.001</b> |
| Reference category = female                  |        |       |                  |        |        |                  |
| Male                                         | -2.341 | 0.323 | <0.001           | 0.302  | 0.035  | <0.001           |
| Another gender identity                      | 2.663  | 1.912 | 0.164            | 0.004  | 0.206  | 0.983            |
| <b>Age</b>                                   | -0.119 | 0.020 | <b>&lt;0.001</b> | 0.009  | 0.002  | <b>&lt;0.001</b> |
| <b>Non-ATSI</b>                              | -2.324 | 0.839 | 0.006            |        |        |                  |
| <b>Living situation</b>                      |        |       | <b>&lt;0.001</b> |        |        | <b>&lt;0.001</b> |
| Reference category = Parents home            |        |       |                  |        |        |                  |
| Own home                                     | -1.738 | 0.534 | 0.001            | 0.259  | 0.057  | <0.001           |
| On-campus                                    | -1.167 | 0.549 | 0.034            | 0.079  | 0.058  | 0.176            |
| Renting                                      | -0.117 | 0.345 | 0.735            | 0.067  | 0.037  | 0.070            |
| Boarding/Homestay                            | 1.723  | 1.009 | 0.088            | -0.057 | 0.109  | 0.599            |
| Irregular                                    | 2.758  | 1.450 | 0.057            | -0.189 | 0.156  | 0.227            |
| <b>Not receiving financial support</b>       | -0.812 | 0.296 | 0.006            | 0.090  | 0.032  | 0.005            |
| <b>Type of degree</b>                        |        |       | <b>0.004</b>     |        |        |                  |
| Reference category = Undergraduate           |        |       |                  |        |        |                  |
| Postgraduate                                 | -1.239 | 0.376 | 0.001            |        |        |                  |
| Other <sup>b</sup>                           | -0.736 | 0.896 | 0.411            |        |        |                  |
| <b>Faculty of study</b>                      |        |       | <b>&lt;0.001</b> |        |        | <b>&lt;0.001</b> |
| Reference category = Health and Medicine     |        |       |                  |        |        |                  |

|                                        |        |       |                  |        |        |                  |
|----------------------------------------|--------|-------|------------------|--------|--------|------------------|
| Business and Law                       | 0.424  | 0.454 | 0.351            | -0.064 | 0.049  | 0.190            |
| Education and Arts                     | 1.806  | 0.373 | <0.001           | -0.207 | 0.040  | <0.001           |
| Engineering                            | 1.381  | 0.496 | 0.005            | -0.160 | 0.053  | 0.003            |
| Science                                | 1.209  | 0.450 | 0.007            | -0.139 | 0.048  | 0.004            |
| English Language and Foundation        |        |       |                  |        |        |                  |
| Studies                                | 2.247  | 1.052 | 0.033            | -0.214 | 0.069  | 0.002            |
| <b>Physical activity (mins/week)</b>   | -0.001 | 0.001 | <b>0.002</b>     | 0.0003 | 0.0001 | <b>&lt;0.001</b> |
| <b>Sleep (hours/24hr period)</b>       | -0.557 | 0.107 | <b>&lt;0.001</b> |        |        |                  |
| <b>Average sitting time (mins/day)</b> | 0.002  | 0.001 | <b>&lt;0.001</b> |        |        |                  |
| <b>AUDIT score</b>                     | 0.161  | 0.029 | <b>&lt;0.001</b> |        |        |                  |
| <b>DUDIT score</b>                     | 0.303  | 0.045 | <b>&lt;0.001</b> | -0.027 | 0.005  | <b>&lt;0.001</b> |
| <b>BMI (kg/m<sup>2</sup>)</b>          | 0.148  | 0.025 | <b>&lt;0.001</b> | -0.012 | 0.003  | <b>&lt;0.001</b> |

<sup>a</sup>β-Coefficient indicates the increase in psychological distress or resilience score per unit increase in the dietary intake variable. Higher psychological distress score indicates higher psychological distress, higher resilience score indicates higher resilience. <sup>b</sup>Includes students enrolled in enabling (i.e. transition to university) courses and English language courses for international students. Significant p-values in **bold**.
